# Supplementary material for: Case report: Sacral agenesis in two boxer dogs: clinical presentation, diagnostic investigations, and outcome
Source: Front Vet Sci. 2023 May 25;10:1201484. doi: 10.3389/fvets.2023.1201484 (PMC10248164; doi:10.3389/fvets.2023.1201484)
Supplement: Supplementary file 1 [file Table_1.XLSX]

## Sheet: Sheet1
Table S1. Accession numbers of 925 dog genome sequences. The affected dog is highlighted in red. The other 924 genome sequences were used as controls in variant filtering.
Sample ID	Breed	Study Accession	Sample Accession	Remark
AF001	Afghan Hound	PRJEB16012	SAMEA110415669
AF002	Afghan Hound	PRJEB16012	SAMEA110415670
AF009	Afghan Hound	PRJEB16012	SAMEA110415671
AF022	Afghan Hound	PRJEB16012	SAMEA110415672
TA001	Airedale Terrier	PRJEB16012	SAMEA4506896
TA006	Airedale Terrier	PRJEB16012	SAMEA6862951
AKIN000001	Akita Inu	PRJNA188158	SAMN21036191
AKIN000002	Akita Inu	PRJNA188158	SAMN21036192
SY001	Alaskan Husky (not purebred)	PRJEB9590	SAMEA3449656
AM007	Alaskan Malamute	PRJEB16012	SAMEA104091571
AM019	Alaskan Malamute	PRJEB16012	SAMEA4848707
AMAL000003	Alaskan Malamute	PRJNA188158	SAMN21036196
AD009	Alpine Dachsbracke	PRJEB14840	SAMEA4346711
AD034	Alpine Dachsbracke	PRJEB16012	SAMEA4848713
AD101	Alpine Dachsbracke	PRJEB16012	SAMEA8797083
AD129	Alpine Dachsbracke	PRJEB16012	SAMEA8797084
AD234	Alpine Dachsbracke	PRJEB16012	SAMEA8797082
ALDB000001	Alpine Dachsbracke	PRJNA188158	SAMN21036179
ALDB000002	Alpine Dachsbracke	PRJNA188158	SAMN21036180
ALDB000003	Alpine Dachsbracke	PRJNA188158	SAMN21036181
ALDB000004	Alpine Dachsbracke	PRJNA188158	SAMN21036182
AKIT000009	American Akita	PRJNA188158	SAMN21036183
CFA628	American Akita	PRJEB16012	SAMEA110415684
AMBD000001	American Bulldog	PRJNA188158	SAMN21036184
CFA074	American Bulldog	PRJEB16012	SAMEA10644715
ACS082	American Cocker Spaniel	PRJEB16012	SAMEA6862930
ACS100	American Cocker Spaniel	PRJEB16012	SAMEA6862931
ACS176	American Cocker Spaniel	PRJEB16012	SAMEA6862932
ACS222	American Cocker Spaniel	PRJEB16012	SAMEA6862933
ACS230	American Cocker Spaniel	PRJEB16012	SAMEA6862934
ACS231	American Cocker Spaniel	PRJEB16012	SAMEA6862935
ACS302	American Cocker Spaniel	PRJEB16012	SAMEA6862936
ACS322	American Cocker Spaniel	PRJEB16012	SAMEA6862937
AS015	American Staffordshire Bullterriers	PRJEB16012	SAMEA110415673
AMST000004	American Staffordshire Terrier	PRJNA188158	SAMN21036206
AMST000005	American Staffordshire Terrier	PRJNA188158	SAMN21036207
AS006	American Staffordshire Terrier	PRJEB16012	SAMEA4504831
AS008	American Staffordshire Terrier	PRJEB16012	SAMEA4867927
AS011	American Staffordshire Terrier	PRJEB16012	SAMEA6249480
ANAT000003	Anatolian Dog	PRJNA188158	SAMN21036208
AP137	Appenzeller Sennenhund	PRJEB16012	SAMEA110175941
APPZ000001	Appenzeller Sennenhund	PRJNA188158	SAMN21036197
APPZ000002	Appenzeller Sennenhund	PRJNA188158	SAMN21036198
APPZ000003	Appenzeller Sennenhund	PRJNA188158	SAMN21036202
APPZ000009	Appenzeller Sennenhund	PRJNA188158	SAMN21036199
APPZ000010	Appenzeller Sennenhund	PRJNA188158	SAMN21036200
APPZ000011	Appenzeller Sennenhund	PRJNA188158	SAMN21036201
APPZ000012	Appenzeller Sennenhund	PRJNA188158	SAMN21036203
APPZ000013	Appenzeller Sennenhund	PRJNA188158	SAMN21036204
APPZ000014	Appenzeller Sennenhund	PRJNA188158	SAMN21036205
AC023	Australian Cattle Dog	PRJEB16012	SAMEA104091560
AC0258	Australian Cattle Dog	PRJEB16012	SAMEA5657396
AC046	Australian Cattle Dog	PRJEB16012	SAMEA104283464
AC065	Australian Cattle dog	PRJEB13468	SAMEA3928139
AC108	Australian Cattle dog	PRJEB16012	SAMEA4504820
AC144	Australian Cattle dog	PRJEB16012	SAMEA8797072
AC160	Australian Cattle dog	PRJEB16012	SAMEA7198609
AC364	Australian Cattle Dog	PRJEB16012	SAMEA104500413
AC483	Australian Cattle Dog	PRJEB16012	SAMEA8157152
AC530	Australian Cattle dog	PRJEB16012	SAMEA7198606
AC602	Australian Cattle Dog	PRJEB16012	SAMEA110415668
AUCD000004	Australian Cattle Dog	PRJNA188158	SAMN21036177
AUCD000005	Australian Cattle Dog	PRJNA188158	SAMN21036178
AUSK000001	Australian Kelpie	PRJNA188158	SAMN21036193
AUSK000002	Australian Kelpie	PRJNA188158	SAMN21036194
AUSK000003	Australian Kelpie	PRJNA188158	SAMN21036195
AU178	Australian Shepherd	PRJEB16012	SAMEA104283461
AU184	Australian Shepherd	PRJEB16012	SAMEA4867934
AU190	Australian Shepherd	PRJEB16012	SAMEA6862957
AU193	Australian Shepherd	PRJEB16012	SAMEA6862979
AU247	Australian Shepherd	PRJEB16012	SAMEA6862929
AU254	Australian Shepherd	PRJEB16012	SAMEA6862980
AU282	Australian Shepherd	PRJEB16012	SAMEA110175942
AU287	Australian Shepherd	PRJEB16012	SAMEA10644714
AUSS000002	Australian Shepherd	PRJNA188158	SAMN21036209
AR001	Australian Terrier	PRJEB16012	SAMEA4504840
BA105	Barbet	PRJEB16012	SAMEA110415674
BRBT000001	Barbet	PRJNA188158	SAMN21036210
BRBT000002	Barbet	PRJNA188158	SAMN21036211
BJ001	Basenji	PRJEB16012	SAMEA104283473
BJ002	Basenji	PRJEB16012	SAMEA104283472
BJ003	Basenji	PRJEB16012	SAMEA104283471
BJ004	Basenji	PRJEB16012	SAMEA104283470
BJ005	Basenji	PRJEB16012	SAMEA104283469
BJ006	Basenji	PRJEB16012	SAMEA104283468
BASS000004	Basset Hound	PRJNA188158	SAMN21036226
BH003	Basset Hound	PRJEB16012	SAMEA4509488
BH010	Basset Hound	PRJEB16012	SAMEA6862953
BH013	Basset Hound	PRJEB16012	SAMEA6862982
BH014	Basset Hound	PRJEB16012	SAMEA6862983
BH015	Basset Hound	PRJEB16012	SAMEA6862984
BH016	Basset Hound	PRJEB16012	SAMEA6862985
BG064	Bavarian Mountain Scent Hound (Bayerischer Gebirgsschweisshund)	PRJEB16012	SAMEA104091562
BG235	Bavarian Mountain Scent Hound (Bayerischer Gebirgsschweisshund)	PRJEB16012	SAMEA8797080
BG240	Bavarian Mountain Scent Hound (Bayerischer Gebirgsschweisshund)	PRJEB16012	SAMEA8797081
BG281	Bavarian Mountain Scent Hound (Bayerischer Gebirgsschweisshund)	PRJEB16012	SAMEA8797079
BMSH000001	Bavarian Mountain Scent Hound (Bayerischer Gebirgsschweisshund)	PRJNA188158	SAMN21036222
BMSH000002	Bavarian Mountain Scent Hound (Bayerischer Gebirgsschweisshund)	PRJNA188158	SAMN21036223
BMSH000003	Bavarian Mountain Scent Hound (Bayerischer Gebirgsschweisshund)	PRJNA188158	SAMN21036224
BMSH000004	Bavarian Mountain Scent Hound (Bayerischer Gebirgsschweisshund)	PRJNA188158	SAMN21036225
BE058	Beagle	PRJEB16012	SAMEA8797069
BE059	Beagle	PRJEB16012	SAMEA8797070
BE060	Beagle	PRJEB16012	SAMEA8797071
BE020	Beagle (contamination mit Westie CMO allele)	PRJEB5500	SAMEA2376414
2M2	Beagle (research colony)	PRJEB16012	SAMEA5204132
3M2	Beagle (research colony)	PRJEB16012	SAMEA5204133
6F4	Beagle (research colony)	PRJEB16012	SAMEA5204134
7F1	Beagle (research colony)	PRJEB16012	SAMEA5204135
BD016	Bearded Collie	PRJEB13468	SAMEA3928140
BD036	Bearded Collie	PRJEB16012	SAMEA4505492
BD052	Bearded Collie	PRJEB16012	SAMEA4504824
BD085	Bearded Collie	PRJEB16012	SAMEA4505493
BD089	Bearded Collie	PRJEB16012	SAMEA4504827
BD091	Bearded Collie	PRJEB16012	SAMEA4505496
BD093	Bearded Collie	PRJEB16012	SAMEA4504832
BD098	Bearded Collie	PRJEB16012	SAMEA4504839
BEAU000003	Beauceron	PRJNA188158	SAMN21036221
BF003	Beauceron	PRJEB16012	SAMEA6862928
CFA537	Beauceron	PRJEB16012	SAMEA110415681
GRND000001	Belgian Shepherd (Groenendael)	PRJNA188158	SAMN21036373
MA805	Belgian Shepherd (Groenendael)	PRJEB16012	SAMEA110175537
BMAL000003	Belgian Shepherd (Laekenois)	PRJNA188158	SAMN21036377
LAEK000003	Belgian Shepherd (Laekenois)	PRJNA188158	SAMN21036376
LAEK000002	Belgian Shepherd (Malinois)	PRJNA188158	SAMN21036375
MA008	Belgian Shepherd (Malinois)	PRJEB16012	SAMEA4504823
MA0163	Belgian Shepherd (Malinois)	PRJEB16012	SAMEA104032048
MA094	Belgian Shepherd (Malinois)	PRJEB16012	SAMEA4504826
MA142	Belgian Shepherd (Malinois)	PRJEB16012	SAMEA104125121
MA152	Belgian Shepherd (Malinois)	PRJEB16012	SAMEA4506898
MA324	Belgian Shepherd (Malinois)	PRJEB16012	SAMEA104125122
MA437	Belgian Shepherd (Malinois)	PRJEB16012	SAMEA4848704
MA446	Belgian Shepherd (Malinois)	PRJEB16012	SAMEA6249499
MA471	Belgian Shepherd (Malinois)	PRJEB16012	SAMEA6249500
MA509	Belgian Shepherd (Malinois)	PRJEB16012	SAMEA7198602
MA546	Belgian Shepherd (Malinois)	PRJEB16012	SAMEA8157186
MA556	Belgian Shepherd (Malinois)	PRJEB16012	SAMEA110175530
MA557	Belgian Shepherd (Malinois)	PRJEB16012	SAMEA110175531
MA558	Belgian Shepherd (Malinois)	PRJEB16012	SAMEA110175532
MA562	Belgian Shepherd (Malinois)	PRJEB16012	SAMEA110175533
MA563	Belgian Shepherd (Malinois)	PRJEB16012	SAMEA8157187
MA565	Belgian Shepherd (Malinois)	PRJEB16012	SAMEA110175534
MA569	Belgian Shepherd (Malinois)	PRJEB16012	SAMEA110175535
MA758	Belgian Shepherd (Malinois)	PRJEB16012	SAMEA110175536
MA816	Belgian Shepherd (Malinois)	PRJEB16012	SAMEA110175538
MA866	Belgian Shepherd (Malinois)	PRJEB16012	SAMEA110415702
MA875	Belgian Shepherd (Malinois) x Dutch Shepherd	PRJEB16012	SAMEA110415703
TERV000003	Belgian Shepherd (Tervueren)	PRJNA188158	SAMN21036374
BERG000001	Bergamasco Sheepdog	PRJNA188158	SAMN21036235
BERG000002	Bergamasco Sheepdog	PRJNA188158	SAMN21036236
BERG000003	Bergamasco Sheepdog	PRJNA188158	SAMN21036237
BERG000004	Bergamasco Sheepdog	PRJNA188158	SAMN21036238
BERG000005	Bergamasco Sheepdog	PRJNA188158	SAMN21036239
BERG000006	Bergamasco Sheepdog	PRJNA188158	SAMN21036240
BBLS000001	Berger Blanc Suisse	PRJNA188158	SAMN21036213
BBLS000002	Berger Blanc Suisse	PRJNA188158	SAMN21036214
BBLS000003	Berger Blanc Suisse	PRJNA188158	SAMN21036215
BY010	Berger des Pyrénées	PRJEB16012	SAMEA6249482
BY014	Berger des Pyrénées	PRJEB16012	SAMEA6249483
BY015	Berger des Pyrénées	PRJEB16012	SAMEA6249484
BRMD000003	Bernese Mountain Dog	PRJNA188158	SAMN21036248
BRMD000005	Bernese Mountain Dog	PRJNA188158	SAMN21036244
BRMD000006	Bernese Mountain Dog	PRJNA188158	SAMN21036245
BRMD000007	Bernese Mountain Dog	PRJNA188158	SAMN21036246
BRMD000008	Bernese Mountain Dog	PRJNA188158	SAMN21036247
BRMD000009	Bernese Mountain Dog	PRJNA188158	SAMN21036249
BRMD000010	Bernese Mountain Dog	PRJNA188158	SAMN21036243
BS2168	Bernese Mountain Dog	PRJEB16012	SAMEA6249477
BS2556	Bernese Mountain Dog	PRJEB16012	SAMEA6862922
BS2557	Bernese Mountain Dog	PRJEB16012	SAMEA6862923
BS2558	Bernese Mountain Dog	PRJEB16012	SAMEA6862924
BS2559	Bernese Mountain Dog	PRJEB16012	SAMEA6862925
BS2560	Bernese Mountain Dog	PRJEB16012	SAMEA6862926
BS2962	Bernese Mountain Dog	PRJEB16012	SAMEA8157153
BS2963	Bernese Mountain Dog	PRJEB16012	SAMEA8157154
BS2964	Bernese Mountain Dog	PRJEB16012	SAMEA8157155
BS2965	Bernese Mountain Dog	PRJEB16012	SAMEA8157156
BS2966	Bernese Mountain Dog	PRJEB16012	SAMEA8157157
BS2967	Bernese Mountain Dog	PRJEB16012	SAMEA8157158
BS2968	Bernese Mountain Dog	PRJEB16012	SAMEA8157159
BS2969	Bernese Mountain Dog	PRJEB16012	SAMEA8157160
BS2970	Bernese Mountain Dog	PRJEB16012	SAMEA8157161
BS2971	Bernese Mountain Dog	PRJEB16012	SAMEA8157162
BS3216	Bernese Mountain Dog	PRJEB16012	SAMEA110415677
BRTR000001	Black Russian Terrier	PRJNA188158	SAMN21036501
BLNK000001	Bolonka Zwetna	PRJNA188158	SAMN21036255
BLNK000002	Bolonka Zwetna	PRJNA188158	SAMN21036256
BLNK000003	Bolonka Zwetna	PRJNA188158	SAMN21036257
BLNK000004	Bolonka Zwetna	PRJNA188158	SAMN21036258
12675RE	Border Collie	PRJEB30571	SAMEA5205221
6958RE	Border Collie	PRJEB30571	SAMEA5205222
BC0480	Border Collie	PRJEB16012	SAMEA104091558
BC1028	Border Collie	PRJNA319610	SRR3466766
BC1029	Border Collie	PRJNA319610	SRR3466767
BC222	Border Collie	PRJNA319610	SRR3466763
BC272	Border Collie	PRJEB4544 / PRJNA188158	SAMEA2177732 / SAMN01908107
BC273	Border Collie	PRJEB16012	SAMEA4505490
BC387	Border Collie	PRJNA319610	SRR3466764
BC485	Border Collie	PRJEB16012	SAMEA104125112
BC518	Border Collie	PRJEB16012	SAMEA104125113
BC547	Border Collie	PRJEB30571	SAMEA5205229
BC548	Border Collie	PRJEB30571	SAMEA5205228
BC549	Border Collie	PRJEB30571	SAMEA5205227
BC555	Border Collie	PRJEB16012	SAMEA104125114
BC578	Border Collie	PRJNA319610	SRR3466765
BC597	Border Collie	PRJEB16012	SAMEA104125115
BC604	Border Collie	PRJEB12337	ERR1210832
BC621	Border Collie	PRJEB16012	SAMEA4867922
BC655	Border Collie	PRJEB16012	SAMEA5657397
BC669	Border Collie	PRJEB16012	SAMEA110415675
BC670	Border Collie	PRJEB16012	SAMEA110415676
BOST000001	Boston Terrier	PRJNA188158	SAMN21036241
DB160	Boxer	PRJEB16012	SAMEA110415686	Affected by Sacral dysgenesis
20191520	Brandlbracke	PRJEB16012	SAMEA6862978
BRIA000004	Briard	PRJNA188158	SAMN21036242
CFA427	Broholmer	PRJEB16012	SAMEA110175952
BT002	Bull Terrier	PRJEB16012	SAMEA6862976
BT012	Bull Terrier	PRJEB16012	SAMEA104125116
BT134	Bull Terrier	PRJEB16012	SAMEA6249481
BULT000002	Bull Terrier	PRJNA188158	SAMN21036250
BU002	Bullmastiff	PRJEB16012	SAMEA103949042
BU034	Bullmastiff	PRJEB16012	SAMEA8157163
BULM000004	Bullmastiff	PRJNA188158	SAMN21036252
CAIR000002	Cairn Terrier	PRJNA188158	SAMN21036262
CAIR000003	Cairn Terrier	PRJNA188158	SAMN21036263
CE073	Cairn Terrier	PRJEB16012	SAMEA104091555
CI001	Cane Corso Italiano	PRJEB30571	SAMEA5205213
CI002	Cane Corso Italiano	PRJEB30571	SAMEA5205214
CI003	Cane Corso Italiano	PRJEB30571	SAMEA5205215
CI004	Cane Corso Italiano	PRJEB30571	SAMEA5205216
CI005	Cane Corso Italiano	PRJEB16012	SAMEA6249478
CI009	Cane Corso Italiano	PRJEB16012	SAMEA8157164
POSD000001	Cão da Serra de Aires	PRJNA188158	SAMN21036271
POSD000002	Cão da Serra de Aires	PRJNA188158	SAMN21036272
POSD000003	Cão da Serra de Aires	PRJNA188158	SAMN21036273
LC003	Cão de Castro Laboreiro	PRJEB16012	SAMEA8797075
CK006	Cavalier King Charles Spaniel	PRJEB16012	SAMEA104091570
CK023	Cavalier King Charles Spaniel	PRJEB16012	SAMEA104091569
CK163	Cavalier King Charles Spaniel	PRJEB16012	SAMEA10644719
CKCS000003	Cavalier King Charles Spaniel	PRJNA188158	SAMN21036266
CHBR000003	Chesapeake Bay Retriever	PRJNA188158	SAMN21036259
CHBR000004	Chesapeake Bay Retriever	PRJNA188158	SAMN21036260
CFA284	Chihuahua	PRJEB16012	SAMEA110175945
CFA285	Chihuahua	PRJEB16012	SAMEA110175946
CFA286	Chihuahua	PRJEB16012	SAMEA110175947
CFA287	Chihuahua	PRJEB16012	SAMEA110175948
CH027	Chihuahua	PRJEB16012	SAMEA4848714
CH030	Chihuahua	PRJEB16012	SAMEA6249485
CH032	Chihuahua	PRJEB16012	SAMEA8797073
CH044	Chihuahua	PRJEB16012	SAMEA10644718
CH048	Chihuahua	PRJEB16012	SAMEA110415685
CHIH000005	Chihuahua	PRJNA188158	SAMN21036264
CH019	Chihuahua (without pedigree)	PRJEB13139	SAMEA3905753
CRES000001	Chinese Crested Dog	PRJNA188158	SAMN21036261
CW011	Chow Chow	PRJEB16012	SAMEA104091566
CP003	Cocker Spaniel	PRJEB16012	SAMEA4506900
CL013	Collie	PRJEB16012	SAMEA4867926
COLL000004	Collie	PRJNA188158	SAMN21036267
CNTI000001	Continental Bulldog	PRJNA188158	SAMN21036412
CNTI000002	Continental Bulldog	PRJNA188158	SAMN21036413
CNTI000003	Continental Bulldog	PRJNA188158	SAMN21036414
CNTI000004	Continental Bulldog	PRJNA188158	SAMN21036415
CNTI000005	Continental Bulldog	PRJNA188158	SAMN21036416
CNTI000006	Continental Bulldog	PRJNA188158	SAMN21036417
COTO000003	Coton de Tulear	PRJNA188158	SAMN21036268
CCRT000001	Curly Coated Retriever	PRJNA188158	SAMN21036269
CCRT000002	Curly Coated Retriever	PRJNA188158	SAMN21036270
CR018	Curly Coated Retriever	PRJEB16012	SAMEA4867931
CR023	Curly Coated Retriever	PRJEB16012	SAMEA4867930
CR039	Curly Coated Retriever	PRJEB16012	SAMEA104091556
CR040	Curly Coated Retriever	PRJEB16012	SAMEA4848709
CR101	Curly Coated Retriever	PRJEB16012	SAMEA4848710
CZEC000001	Czechoslovakian Wolfdog	PRJNA188158	SAMN21036513
CZEC000002	Czechoslovakian Wolfdog	PRJNA188158	SAMN21036514
DH0117	Dachshund	PRJEB16012	SAMEA104091567
DH098	Dachshund	PRJEB7736	SAMEA3121338
DH126	Dachshund	PRJEB16012	SAMEA104125117
DH159	Dachshund	PRJEB16012	SAMEA8157168
DALM000003	Dalmatian	PRJNA188158	SAMN21036274
GMSP000001	Deutscher Wachtelhund	PRJNA188158	SAMN21036285
GMSP000002	Deutscher Wachtelhund	PRJNA188158	SAMN21036286
GMSP000003	Deutscher Wachtelhund	PRJNA188158	SAMN21036287
GMSP000004	Deutscher Wachtelhund	PRJNA188158	SAMN21036288
D_32321	Doberman Pinscher	PRJEB36029	SAMEA7190237
D_34425	Doberman Pinscher	PRJEB36029	SAMEA7190113
DO159	Doberman Pinscher	PRJEB16012	SAMEA4509491
DO263	Doberman Pinscher	PRJEB16012	SAMEA4509492
DO665	Doberman Pinscher	PRJEB16012	SAMEA6249486
DO675	Doberman Pinscher	PRJEB16012	SAMEA110175954
DOBP000001	Doberman Pinscher	PRJNA188158	SAMN21036281
DOBP000002	Doberman Pinscher	PRJNA188158	SAMN21036276
DOBP000003	Doberman Pinscher	PRJNA188158	SAMN21036277
DOBP000004	Doberman Pinscher	PRJNA188158	SAMN21036278
DOBP000005	Doberman Pinscher	PRJNA188158	SAMN21036279
DOBP000006	Doberman Pinscher	PRJNA188158	SAMN21036280
DOBP000007	Doberman Pinscher	PRJNA188158	SAMN21036282
DG0003	Dogo Argentino	PRJEB16012	SAMEA8157167
BX002	Dogue de Bordeaux	PRJEB30571	SAMEA5205223
BX003	Dogue de Bordeaux	PRJEB30571	SAMEA5205224
BX004	Dogue de Bordeaux	PRJEB16012	SAMEA6862916
BX005	Dogue de Bordeaux	PRJEB16012	SAMEA6862917
BX006	Dogue de Bordeaux	PRJEB16012	SAMEA6862919
BX007	Dogue de Bordeaux	PRJEB16012	SAMEA6862920
BX008	Dogue de Bordeaux	PRJEB16012	SAMEA6862921
DSHP000001	Dutch Shepherd	PRJNA188158	SAMN21036332
DSHP000002	Dutch Shepherd	PRJNA188158	SAMN21036333
HO013	Dutch Shepherd	PRJEB16012	SAMEA6862981
WW647__Zombie	Dutch Shepherd	PRJEB16012	SAMEA5059511
EL565	Elo	PRJEB16012	SAMEA4506890
ELOD000001	Elo	PRJNA188158	SAMN21036290
ELOD000002	Elo	PRJNA188158	SAMN21036291
ELOD000003	Elo	PRJNA188158	SAMN21036292
ELOD000004	Elo	PRJNA188158	SAMN21036293
ELOD000005	Elo	PRJNA188158	SAMN21036294
BULD000001	English Bulldog	PRJNA188158	SAMN21036289
EB003	English Bulldog	PRJEB16012	SAMEA4848708
ESET000004	English Setter	PRJNA188158	SAMN21036302
EP015	English Springer Spaniel	PRJEB16012	SAMEA110175956
EP033	English Springer Spaniel	PRJEB16012	SAMEA110175523
ESSP000003	English Springer Spaniel	PRJNA188158	SAMN21036301
EN091	Entlebucher Mountain Dog	PRJEB16012	SAMEA4504828
EN154	Entlebucher Mountain Dog	PRJEB16012	SAMEA4505497
EN221	Entlebucher Mountain Dog	PRJEB16012	SAMEA4504829
EN247	Entlebucher Mountain Dog	PRJEB16012	SAMEA4505498
EN261	Entlebucher Mountain Dog	PRJEB16012	SAMEA4504830
EN263	Entlebucher Mountain Dog	PRJEB16012	SAMEA4505500
EN264	Entlebucher Mountain Dog	PRJEB16012	SAMEA4505501
ENTB000004	Entlebucher Mountain Dog	PRJNA188158	SAMN21036298
ENTB000005	Entlebucher Mountain Dog	PRJNA188158	SAMN21036299
ENTB000006	Entlebucher Mountain Dog	PRJNA188158	SAMN21036300
ENTB000007	Entlebucher Mountain Dog	PRJNA188158	SAMN21036295
ENTB000008	Entlebucher Mountain Dog	PRJNA188158	SAMN21036296
ENTB000009	Entlebucher Mountain Dog	PRJNA188158	SAMN21036297
EU008	Eurasier	PRJEB6079	SAMEA2446720
EU037	Eurasier	PRJEB16012	SAMEA8157171
EU061	Eurasier	PRJEB16012	SAMEA110415689
EU122	Eurasier	PRJEB16012	SAMEA110415690
EURA000002	Eurasier	PRJNA188158	SAMN21036303
EURA000003	Eurasier	PRJNA188158	SAMN21036304
FX002	Foxterrier	PRJEB16012	SAMEA6862971
FX003	Foxterrier	PRJEB16012	SAMEA6862972
FX004	Foxterrier	PRJEB16012	SAMEA6862973
FXTE000001	Foxterrier	PRJEB16012	SAMEA7297164
FB065	French Bulldog	PRJEB16012	SAMEA4504835
FB081	French Bulldog	PRJEB16012	SAMEA6249479
FB100	French Bulldog	PRJEB16012	SAMEA6862974
FB149	French Bulldog	PRJEB16012	SAMEA8157172
FB150	French Bulldog	PRJEB16012	SAMEA8157173
FBUL000004	French Bulldog	PRJNA188158	SAMN21036305
GHND000001	German Hound	PRJNA188158	SAMN21036227
GHND000002	German Hound	PRJNA188158	SAMN21036228
GHND000003	German Hound	PRJNA188158	SAMN21036229
GHND000004	German Hound	PRJNA188158	SAMN21036230
GHND000005	German Hound	PRJNA188158	SAMN21036231
GHND000006	German Hound	PRJNA188158	SAMN21036232
GHUT000001	German Hunting Terrier	PRJNA188158	SAMN21036348
GHUT000002	German Hunting Terrier	PRJNA188158	SAMN21036349
JT007	German Hunting Terrier	PRJEB16012	SAMEA104125120
JT011	German Hunting Terrier	PRJEB16012	SAMEA104283460
CFA086	German Long-haired Pointing Dog (Deutsch langhaar)	PRJEB16012	SAMEA110415678
DP208	German Pinscher	PRJEB16012	SAMEA8157169
GPIN000001	German Pinscher	PRJNA188158	SAMN21036283
GPIN000002	German Pinscher	PRJNA188158	SAMN21036284
DS043	German Shepherd	PRJEB16012	SAMEA4506895
DS051	German Shepherd	PRJEB16012	SAMEA72802168
DS053	German Shepherd	PRJEB16012	SAMEA72802918
DS064	German Shepherd	PRJEB16012	SAMEA104283465
DS077	German Shepherd	PRJEB16012	SAMEA5657392
DS102	German Shepherd	PRJEB16012	SAMEA8157170
DS113	German Shepherd	PRJEB16012	SAMEA110175955
DK008	German Shorthaired Pointer	PRJEB16012	SAMEA5657398
DK398	German Shorthaired Pointer	PRJEB16012	SAMEA6249504
GSPZ000001	German Spitz (Giant Spitz)	PRJNA188158	SAMN21036325
GSPZ000002	German Spitz (Giant Spitz)	PRJNA188158	SAMN21036328
GSPZ000003	German Spitz (Giant Spitz)	PRJNA188158	SAMN21036319
GSPZ000004	German Spitz (Giant Spitz)	PRJNA188158	SAMN21036320
GSPZ000005	German Spitz (Giant Spitz)	PRJNA188158	SAMN21036321
GSPZ000006	German Spitz (Giant Spitz)	PRJNA188158	SAMN21036322
GSZG000001	German Spitz (Giant Spitz)	PRJNA188158	SAMN21036323
GSZG000002	German Spitz (Giant Spitz)	PRJNA188158	SAMN21036324
GSZG000003	German Spitz (Giant Spitz)	PRJNA188158	SAMN21036326
GSZG000004	German Spitz (Giant Spitz)	PRJNA188158	SAMN21036327
GSZG000005	German Spitz (Giant Spitz)	PRJNA188158	SAMN21036329
GSZG000006	German Spitz (Giant Spitz)	PRJNA188158	SAMN21036330
GSZM000007	German Spitz (Medium Size Spitz)	PRJNA188158	SAMN21036389
GSZM000008	German Spitz (Medium Size Spitz)	PRJNA188158	SAMN21036390
GSZM000009	German Spitz (Medium Size Spitz)	PRJNA188158	SAMN21036391
GSZM000010	German Spitz (Medium Size Spitz)	PRJNA188158	SAMN21036392
GSZM000011	German Spitz (Medium Size Spitz)	PRJNA188158	SAMN21036393
GSZM000012	German Spitz (Medium Size Spitz)	PRJNA188158	SAMN21036388
GSPK000007	German Spitz (Miniature Spitz)	PRJNA188158	SAMN21036357
GSPK000008	German Spitz (Miniature Spitz)	PRJNA188158	SAMN21036358
GSPK000009	German Spitz (Miniature Spitz)	PRJNA188158	SAMN21036359
GSPK000010	German Spitz (Miniature Spitz)	PRJNA188158	SAMN21036360
GSPK000011	German Spitz (Miniature Spitz)	PRJNA188158	SAMN21036361
GSZG000007	German Spitz (Miniature Spitz)	PRJNA188158	SAMN21036356
GW004	German Wirehaired Pointer	PRJEB13468	SAMEA3928144
GW005	German Wirehaired Pointer	PRJEB16012	SAMEA6862962
GW026	German Wirehaired Pointer	PRJEB16012	SAMEA6862963
GW028	German Wirehaired Pointer	PRJEB16012	SAMEA6862964
GW029	German Wirehaired Pointer	PRJEB16012	SAMEA6862965
GW030	German Wirehaired Pointer	PRJEB16012	SAMEA6862966
GW041	German Wirehaired Pointer	PRJEB16012	SAMEA6862967
GW043	German Wirehaired Pointer	PRJEB16012	SAMEA6862977
GW045	German Wirehaired Pointer	PRJEB16012	SAMEA6862968
GW046	German Wirehaired Pointer	PRJEB16012	SAMEA6862969
GW048	German Wirehaired Pointer	PRJEB16012	SAMEA6862970
GWHP000003	German Wirehaired Pointer	PRJNA188158	SAMN21036331
GSNZ000003	Giant Schnauzer	PRJNA188158	SAMN21036443
GOLD000002	Golden Retriever	PRJNA188158	SAMN21036313
GOLD000003	Golden Retriever	PRJNA188158	SAMN21036314
GOLD000004	Golden Retriever	PRJNA188158	SAMN21036315
GOLD000005	Golden Retriever	PRJNA188158	SAMN21036316
GOLD000007	Golden Retriever	PRJNA188158	SAMN21036318
GR0855	Golden Retriever	PRJEB16012	SAMEA4504838
GR0859	Golden Retriever	PRJEB16012	SAMEA4506899
GR0860	Golden Retriever	PRJEB16012	SAMEA4509487
GR0892	Golden Retriever	PRJEB16012	SAMEA104016307
GR1161	Golden Retriever	PRJEB16012	SAMEA4867924
GR1301	Golden Retriever	PRJEB16012	SAMEA6249503
GR1379	Golden Retriever	PRJEB16012	SAMEA8797074
GR1480	Golden Retriever	PRJEB16012	SAMEA8157174
GR1078	Golden Retriever Mix	PRJEB16012	SAMEA104091572
CFA617	Goldendoodle	PRJEB16012	SAMEA110415682
GBGV000004	Grand Basset Griffon Vendeen	PRJEB16012	SAMEA7297165
DD116	Great Dane	PRJEB16012	SAMEA104091557
DD304	Great Dane	PRJEB16012	SAMEA8157166
DD319	Great Dane	PRJEB16012	SAMEA10644720
DD349	Great Dane	PRJEB16012	SAMEA110415687
DD359	Great Dane	PRJEB16012	SAMEA110415688
GP3	Great Pyrenees	PRJEB16012	SAMEA4848700
GSMD000002	Great Swiss Mountain Dog	PRJNA188158	SAMN21036459
GSMD000003	Great Swiss Mountain Dog	PRJNA188158	SAMN21036460
GSMD000005	Great Swiss Mountain Dog	PRJNA188158	SAMN21036461
GSMD000006	Great Swiss Mountain Dog	PRJNA188158	SAMN21036462
GSMD000007	Great Swiss Mountain Dog	PRJNA188158	SAMN21036463
GSMD000008	Great Swiss Mountain Dog	PRJNA188158	SAMN21036464
GSMD000009	Great Swiss Mountain Dog	PRJNA188158	SAMN21036465
GSMD000010	Great Swiss Mountain Dog	PRJNA188158	SAMN21036466
SH010	Great Swiss Mountain Dog	PRJEB16012 / PRJEB30571	SAMEA104658569 / SAMEA5205218
SH011	Great Swiss Mountain Dog	PRJEB16012 / PRJEB30571	SAMEA104658570 / SAMEA5205219
SH050	Great Swiss Mountain Dog	PRJEB16012	SAMEA6249502
GREE000001	Greenland Dog	PRJNA188158	SAMN21036308
GREE000002	Greenland Dog	PRJNA188158	SAMN21036309
GREE000003	Greenland Dog	PRJNA188158	SAMN21036310
GY391	Greyhound	PRJEB16012	SAMEA4867933
GY393	Greyhound	PRJEB16012	SAMEA4848711
GY415	Greyhound	PRJEB16012	SAMEA4867932
GY416	Greyhound	PRJEB16012	SAMEA4848712
GY432	Greyhound	PRJEB16012	SAMEA104125118
GY453	Greyhound	PRJEB16012	SAMEA8157175
CFA155	Griffon d'arret Korthals	PRJEB16012	SAMEA10644717
LMUN000001	Grosser Münsterländer	PRJNA188158	SAMN21036312
HVSC000001	Hanoverian Hound	PRJNA188158	SAMN21036334
HT001	Heideterrier	PRJEB16012	SAMEA103135918
HOVA000001	Hovawart	PRJNA188158	SAMN21036335
HOVA000002	Hovawart	PRJNA188158	SAMN21036336
HW1706	Hovawart	PRJEB16012	SAMEA4506894
HW1872	Hovawart	PRJEB16012	SAMEA4848705
HW1979	Hovawart	PRJEB16012	SAMEA4867928
MV017	Hungarian Short-Haired Pointer (Vizsla)	PRJEB16012	SAMEA110175539
V_23005	Hungarian Short-Haired Pointer (Vizsla)	PRJEB12340	ERR1210830
VIZS000003	Hungarian Short-Haired Pointer (Vizsla)	PRJNA188158	SAMN21036396
VIZS000004	Hungarian Short-Haired Pointer (Vizsla)	PRJNA188158	SAMN21036397
VIZS000005	Hungarian Short-Haired Pointer (Vizsla)	PRJNA188158	SAMN21036398
SY061	Husky	PRJEB16012	SAMEA10644739
IRSE000002	Irish Red Setter	PRJNA188158	SAMN21036337
IST011	Irish Soft Coated Wheaten Terrier	PRJEB16012	SAMEA6249488
IST012	Irish Soft Coated Wheaten Terrier	PRJEB16012	SAMEA6249489
IST013	Irish Soft Coated Wheaten Terrier	PRJEB16012	SAMEA6249490
IST014	Irish Soft Coated Wheaten Terrier	PRJEB16012	SAMEA6249491
IST016	Irish Soft Coated Wheaten Terrier	PRJEB16012	SAMEA6249493
IST017	Irish Soft Coated Wheaten Terrier	PRJEB16012	SAMEA6249494
IST018	Irish Soft Coated Wheaten Terrier	PRJEB16012	SAMEA6249495
IST019	Irish Soft Coated Wheaten Terrier	PRJEB16012	SAMEA6258987
IST020	Irish Soft Coated Wheaten Terrier	PRJEB16012	SAMEA6249496
IRIT000002	Irish Terrier	PRJNA188158	SAMN21036338
IT0390	Irish Terrier	PRJEB16012	SAMEA104283467
IT221	Irish Terrier	PRJEB13468	SAMEA3928141
IH0001	Irish Wolfhound	PRJEB16012	SAMEA7198607
IW015	Italian Greyhound	PRJEB16012	SAMEA8157176
JR0034	Jack Russell Terrier	PRJEB16012	SAMEA104125119
JR045	Jack Russell Terrier	PRJEB16012	SAMEA4867925
JR048	Jack Russell Terrier	PRJEB16012	SAMEA6249497
JR052	Jack Russell Terrier	PRJEB16012	SAMEA6249498
JR056	Jack Russell Terrier	PRJEB16012	SAMEA110415691
JSPZ000001	Japanese Spitz	PRJNA188158	SAMN21036340
JSPZ000002	Japanese Spitz	PRJNA188158	SAMN21036344
JSPZ000003	Japanese Spitz	PRJNA188158	SAMN21036346
JSPZ000007	Japanese Spitz	PRJNA188158	SAMN21036339
JSPZ000008	Japanese Spitz	PRJNA188158	SAMN21036341
JSPZ000009	Japanese Spitz	PRJNA188158	SAMN21036342
JSPZ000010	Japanese Spitz	PRJNA188158	SAMN21036343
JSPZ000011	Japanese Spitz	PRJNA188158	SAMN21036345
JSPZ000012	Japanese Spitz	PRJNA188158	SAMN21036347
KEES000003	Keeshond	PRJNA188158	SAMN21036519
KEES000004	Keeshond	PRJNA188158	SAMN21036520
KEES000007	Keeshond	PRJNA188158	SAMN21036518
KEES000008	Keeshond	PRJNA188158	SAMN21036521
KEES000009	Keeshond	PRJNA188158	SAMN21036522
KEES000010	Keeshond	PRJNA188158	SAMN21036523
KEES000011	Keeshond	PRJNA188158	SAMN21036524
KEES000012	Keeshond	PRJNA188158	SAMN21036525
KB0003	Kerry Blue Terrier	PRJEB16012	SAMEA8157177
KERY000001	Kerry Blue Terrier	PRJNA188158	SAMN21036350
KMUM000003	Kleiner Münsterländer	PRJNA188158	SAMN21036354
KMUM000004	Kleiner Münsterländer	PRJNA188158	SAMN21036355
KF042	Kromfohrländer	PRJEB6076	SAMEA2446055
KROM000001	Kromfohrländer	PRJNA188158	SAMN21036351
KROM000002	Kromfohrländer	PRJNA188158	SAMN21036352
KROM000003	Kromfohrländer	PRJNA188158	SAMN21036353
FAM005423	Kuvasz	PRJNA188158	SAMN23424288
CFA289	Labradoodle	PRJEB16012	SAMEA110175949
LA1869	Labrador Retriever	PRJEB16012	SAMEA4504834
LA2438	Labrador Retriever	PRJEB16012	SAMEA5209182
LA2443	Labrador Retriever	PRJEB16012	SAMEA104091568
LA2928	Labrador Retriever	PRJEB16012	SAMEA6862915
LA3186	Labrador Retriever	PRJEB16012	SAMEA8157178
LA3197	Labrador Retriever	PRJEB16012	SAMEA10644721
LA3222	Labrador Retriever	PRJEB16012	SAMEA8157179
LA3258	Labrador Retriever	PRJEB16012	SAMEA110415692
LA3260	Labrador Retriever	PRJEB16012	SAMEA10644722
LA3305	Labrador Retriever	PRJEB16012	SAMEA10644723
LA3337	Labrador Retriever	PRJEB16012	SAMEA110175524
LA3400	Labrador Retriever	PRJEB16012	SAMEA110175525
LA3401	Labrador Retriever	PRJEB16012	SAMEA110175526
LA3422	Labrador Retriever	PRJEB16012	SAMEA110415693
LA882	Labrador Retriever	PRJEB5874	SAMEA2417015
LABR000001	Labrador Retriever	PRJNA188158	SAMN21036365
LABR000002	Labrador Retriever	PRJNA188158	SAMN21036366
LABR000003	Labrador Retriever	PRJNA188158	SAMN21036367
LABR000004	Labrador Retriever	PRJNA188158	SAMN21036368
LABR000005	Labrador Retriever	PRJNA188158	SAMN21036369
LABR000006	Labrador Retriever	PRJNA188158	SAMN21036370
LR1030	Lagotto Romagnolo	PRJEB16012	SAMEA4509490
LR1149	Lagotto Romagnolo	PRJEB16012	SAMEA4867929
LR1194	Lagotto Romagnolo	PRJEB16012	SAMEA8157180
LR1246	Lagotto Romagnolo	PRJEB16012	SAMEA110415694
LR1247	Lagotto Romagnolo	PRJEB16012	SAMEA110415695
LR1248	Lagotto Romagnolo	PRJEB16012	SAMEA5657400
LR1250	Lagotto Romagnolo	PRJEB16012	SAMEA110415696
LR1268	Lagotto Romagnolo	PRJEB16012	SAMEA6862927
LR1277	Lagotto Romagnolo	PRJEB16012	SAMEA8157181
LR1278	Lagotto Romagnolo	PRJEB16012	SAMEA6862954
LR1279	Lagotto Romagnolo	PRJEB16012	SAMEA8157182
LR1280	Lagotto Romagnolo	PRJEB16012	SAMEA8157183
LR1310	Lagotto Romagnolo	PRJEB16012	SAMEA6862975
LR1388	Lagotto Romagnolo	PRJEB16012	SAMEA110415697
LR1407	Lagotto Romagnolo	PRJEB16012	SAMEA110415698
LR1478	Lagotto Romagnolo	PRJEB16012	SAMEA110415699
LR1484	Lagotto Romagnolo	PRJEB16012	SAMEA110415700
LR1489	Lagotto Romagnolo	PRJEB16012	SAMEA110415701
LR390	Lagotto Romagnolo	PRJEB13468	SAMEA3928142
LR416	Lagotto Romagnolo	PRJEB16012	SAMEA4867935
LR433	Lagotto Romagnolo	PRJEB16012	SAMEA4505491
LR460	Lagotto Romagnolo	PRJEB16012	SAMEA8157184
LR494	Lagotto Romagnolo	PRJEB16012	SAMEA4505494
LR538	Lagotto Romagnolo	PRJEB16012	SAMEA104283462
LR613	Lagotto Romagnolo	PRJEB16012	SAMEA8157185
LR654	Lagotto Romagnolo	PRJEB16012	SAMEA104283463
LR753	Lagotto Romagnolo	PRJEB16012	SAMEA4504833
LDSR000001	Landseer	PRJNA188158	SAMN21036371
LDSR000002	Landseer	PRJNA188158	SAMN21036372
LN048	Landseer	PRJEB9437	SAMEA3402917
FAM005602	Leonberger	PRJNA188158	SAMN21036535
FAM005603	Leonberger	PRJNA188158	SAMN21036536
LB0013	Leonberger	PRJEB16012	SAMEA4848665
LB0139	Leonberger	PRJEB16012	SAMEA4848666
LB0147	Leonberger	PRJEB16012	SAMEA4848690
LB0197	Leonberger	PRJEB16012	SAMEA4848676
LB0268	Leonberger	PRJEB16012	SAMEA4848668
LB0304	Leonberger	PRJEB16012	SAMEA4848669
LB0305	Leonberger	PRJEB16012	SAMEA4848670
LB0339	Leonberger	PRJEB16012	SAMEA4848671
LB0453	Leonberger	PRJEB16012	SAMEA8797091
LB0482	Leonberger	PRJEB16012	SAMEA4848673
LB0507	Leonberger	PRJEB16012	SAMEA4848691
LB0554	Leonberger	PRJEB16012	SAMEA4848692
LB0656	Leonberger	PRJEB16012	SAMEA4848693
LB0683	Leonberger	PRJEB16012	SAMEA4848674
LB0908	Leonberger	PRJEB16012	SAMEA8797095
LB1000	Leonberger	PRJEB16012	SAMEA8797087
LB111	Leonberger	PRJEB16012	SAMEA47266168
LB1428	Leonberger	PRJEB16012	SAMEA8797088
LB1429	Leonberger	PRJEB16012	SAMEA8797090
LB1848	Leonberger	PRJEB16012	SAMEA104656180
LB1919	Leonberger	PRJEB16012	SAMEA103935360
LB1961	Leonberger	PRJEB16012	SAMEA4848675
LB214	Leonberger	PRJEB16012	SAMEA4867936
LB3506	Leonberger	PRJEB16012	SAMEA4848684
LB3521	Leonberger	PRJEB16012	SAMEA4848694
LB3586	Leonberger	PRJEB16012	SAMEA8797096
LB3906	Leonberger	PRJEB16012	SAMEA4848688
LB4114	Leonberger	PRJEB16012	SAMEA7297166
LB4183	Leonberger	PRJEB16012	SAMEA4848689
LB4508	Leonberger	PRJEB16012	SAMEA7297167
LB4517	Leonberger	PRJEB16012	SAMEA8797094
LB4532	Leonberger	PRJEB16012	SAMEA8797092
LB4693	Leonberger	PRJEB16012	SAMEA4848695
LB4723	Leonberger	PRJEB16012	SAMEA10644724
LB4909	Leonberger	PRJEB16012	SAMEA10644725
LB5378	Leonberger	PRJEB16012	SAMEA4873254
LB5550	Leonberger	PRJEB16012	SAMEA110175527
LB5751	Leonberger	PRJEB16012	SAMEA4848699
LB6011	Leonberger	PRJEB16012	SAMEA10644726
LB6113	Leonberger	PRJEB16012	SAMEA8797089
LB6208	Leonberger	PRJEB16012	SAMEA8797093
LB6211	Leonberger	PRJEB16012	SAMEA110175528
LB6285	Leonberger	PRJEB16012	SAMEA7198610
LB6341	Leonberger	PRJEB16012	SAMEA7297169
LB6466	Leonberger	PRJEB16012	SAMEA10644727
LB6480	Leonberger	PRJEB16012	SAMEA10644728
LB6485	Leonberger	PRJEB16012	SAMEA10644729
LB6508	Leonberger	PRJEB16012	SAMEA10644730
LB6543	Leonberger	PRJEB16012	SAMEA10644731
LB6546	Leonberger	PRJEB16012	SAMEA10644732
LB6665	Leonberger	PRJEB16012	SAMEA10644733
LB6782	Leonberger	PRJEB16012	SAMEA110175529
LE0048	Leonberger	PRJEB16012	SAMEA8230809
LE0051	Leonberger	PRJEB16012	SAMEA4848677
LE0096	Leonberger	PRJEB16012	SAMEA8230810
LE0116	Leonberger	PRJEB16012	SAMEA8230811
LE0237	Leonberger	PRJEB16012	SAMEA4848678
LE0269	Leonberger	PRJEB16012	SAMEA4848679
LE0316	Leonberger	PRJEB16012	SAMEA8230812
LE0454	Leonberger	PRJEB16012	SAMEA8230813
LE0512	Leonberger	PRJEB16012	SAMEA4848680
LE0734	Leonberger	PRJEB16012	SAMEA8230814
LE0738	Leonberger	PRJEB16012	SAMEA4848681
LE0812	Leonberger	PRJEB16012	SAMEA8230815
LE0823	Leonberger	PRJEB16012	SAMEA8230816
LE0896	Leonberger	PRJEB16012	SAMEA4848696
LE114725	Leonberger	PRJEB16012	SAMEA8230817
LE1160	Leonberger	PRJEB16012	SAMEA8230818
LE1294	Leonberger	PRJEB16012	SAMEA4848682
LE1301	Leonberger	PRJEB16012	SAMEA4848683
LE1302	Leonberger	PRJEB16012	SAMEA4848697
LE1306	Leonberger	PRJEB16012	SAMEA8230819
LE1355	Leonberger	PRJEB16012	SAMEA4848698
LE2450	Leonberger	PRJEB16012	SAMEA104656181
LE2614	Leonberger	PRJEB16012	SAMEA8797085
LE2887	Leonberger	PRJEB16012	SAMEA8797086
LE3212	Leonberger	PRJEB16012	SAMEA5657399
LE3257	Leonberger	PRJEB16012	SAMEA10644734
LE3765	Leonberger	PRJEB16012	SAMEA10644735
LE3832	Leonberger	PRJEB16012	SAMEA10644736
MALT000002	Maltese	PRJNA188158	SAMN21036233
MALT000003	Maltese	PRJNA188158	SAMN21036234
FAM005424	Manchester Terrier	PRJNA188158	SAMN23802765
MARM000001	Maremma Sheepdog	PRJNA188158	SAMN21036381
MARM000002	Maremma Sheepdog	PRJNA188158	SAMN21036382
MARM000003	Maremma Sheepdog	PRJNA188158	SAMN21036383
EM003	Mastiff	PRJEB16012	SAMEA6249487
GSZM000001	Medium Size Spitz	PRJNA188158	SAMN21036384
GSZM000002	Medium Size Spitz	PRJNA188158	SAMN21036385
GSZM000003	Medium Size Spitz	PRJNA188158	SAMN21036386
GSZM000004	Medium Size Spitz	PRJNA188158	SAMN21036387
XOLO000003	Mexican Hairless	PRJNA188158	SAMN21036399
XOLO000004	Mexican Hairless	PRJNA188158	SAMN21036400
XOLO000005	Mexican Hairless	PRJNA188158	SAMN21036401
BT001	Miniature Bull Terrier	PRJEB16012	SAMEA6862958
BT007	Miniature Bull Terrier	PRJEB16012	SAMEA4506897
BT008	Miniature Bull Terrier	PRJEB16012	SAMEA6862959
MB003	Miniature Bull Terrier	PRJEB16012	SAMEA4867920
MBLT000002	Miniature Bull Terrier	PRJNA188158	SAMN21036378
MBLT000003	Miniature Bull Terrier	PRJNA188158	SAMN21036379
MBLT000004	Miniature Bull Terrier	PRJNA188158	SAMN21036380
MPIN000002	Miniature Pinscher	PRJNA188158	SAMN21036440
MPIN000003	Miniature Pinscher	PRJNA188158	SAMN21036441
MS32	Miniature Schnauzer	PRJEB16012	SAMEA5059499
MS77	Miniature Schnauzer	PRJEB16012	SAMEA5059500
MSNZ000002	Miniature Schnauzer	PRJNA188158	SAMN21036534
ZZ024_MS13	Miniature Schnauzer	PRJEB16012	SAMEA5059514
ZZ025_MS25	Miniature Schnauzer	PRJEB16012	SAMEA5059515
ZZ026_MS80	Miniature Schnauzer	PRJEB16012	SAMEA5059516
ZZ028_MS171	Miniature Schnauzer	PRJEB16012	SAMEA5059517
ZZ029_MS190	Miniature Schnauzer	PRJEB16012	SAMEA5059518
ZZ031_MS249	Miniature Schnauzer	PRJEB16012	SAMEA5059520
ZZ032_MS251	Miniature Schnauzer	PRJEB16012	SAMEA5059521
ZZ034_MS260	Miniature Schnauzer	PRJEB16012	SAMEA5059522
ZZ035_MS279	Miniature Schnauzer	PRJEB16012	SAMEA5059523
ZZ046	Miniature Schnauzer	PRJEB16012	SAMEA110175543
ZZ17_MS07	Miniature Schnauzer	PRJEB16012	SAMEA1066474
ZZ18_MS08	Miniature Schnauzer	PRJEB16012	SAMEA1066475
ZZ19_MS09	Miniature Schnauzer	PRJEB16012	SAMEA1066476
GSPK000001	Miniature Spitz	PRJNA188158	SAMN21036362
GSPK000002	Miniature Spitz	PRJNA188158	SAMN21036363
GSPK000003	Miniature Spitz	PRJNA188158	SAMN21036364
CFA204	Mixed breed	PRJEB16012	SAMEA110175943
CFA205	Mixed breed	PRJEB16012	SAMEA110175944
CFA477	Mixed breed	PRJEB16012	SAMEA110175953
CFA534	Mixed breed	PRJEB16012	SAMEA110415680
DS032	Mixed breed	PRJEB14110	SAMEA3994036
DS041	Mixed breed	PRJEB14110	SAMEA3994037
DS042	Mixed breed	PRJEB14110	SAMEA3994038
MI016	Mixed Breed	PRJEB16012	SAMEA4506893
MI020	Mixed breed	PRJEB16012	SAMEA4867919
MI025	mixed breed	PRJEB16012	SAMEA4867923
MI035	Mixed Breed	PRJEB16012	SAMEA8797077
MI041	Mixed breed	PRJEB16012	SAMEA10833662
MI045	Mixed Breed	PRJEB16012	SAMEA10833663
MI048	Mixed breed	PRJEB16012	SAMEA10833664
MI038	Mixed Breed (Border Collie x Labrador)	PRJEB16012	SAMEA8797078
MI034	Mixed Breed (German Shepherd x Malinois)	PRJEB16012	SAMEA6862986
LA2382	Mixed Breed (Labrador Retriever cross, Italy)	PRJEB16012	SAMEA104125075
EMC	Mixed breed of Lapponian Herder origin	PRJEB16012	SAMEA6862938
LH22	Mixed breed of Lapponian Herder origin	PRJEB16012	SAMEA6862942
H29	Mixed breed of Siberian Husky origin	PRJEB16012	SAMEA6862939
H38	Mixed breed of Siberian Husky origin	PRJEB16012	SAMEA6862940
H59	Mixed breed of Siberian Husky origin	PRJEB16012	SAMEA6862941
MUDI000003	Mudi	PRJNA188158	SAMN21036394
MUDI000004	Mudi	PRJNA188158	SAMN21036395
NEWF000003	Newfoundland	PRJNA188158	SAMN21036402
NEWF000004	Newfoundland	PRJNA188158	SAMN21036403
NF187000	Newfoundland	PRJEB16012	SAMEA4848701
NF492	Newfoundland	PRJEB16012	SAMEA104500411
NORF000003	Norfolk Terrier	PRJNA188158	SAMN21036404
NORF000004	Norfolk Terrier	PRJNA188158	SAMN21036405
NORF000005	Norfolk Terrier	PRJNA188158	SAMN21036406
NOWT000003	Norwich Terrier	PRJNA188158	SAMN21036410
NOWT000004	Norwich Terrier	PRJNA188158	SAMN21036411
NW062	Norwich Terrier	PRJEB16012	SAMEA104091550
NW152	Norwich Terrier	PRJEB16012	SAMEA104091551
NW206	Norwich Terrier	PRJEB16012	SAMEA104091552
NW255	Norwich Terrier	PRJEB16012	SAMEA104091553
NR374	Nova Scotia Duck Tolling Retriever	PRJEB16012	SAMEA10644737
NSDT000003	Nova Scotia Duck Tolling Retriever	PRJNA188158	SAMN21036407
OLES000004	Old English Sheepdog	PRJNA188158	SAMN21036418
OLES000005	Old English Sheepdog	PRJNA188158	SAMN21036419
OLGS000001	Old German Shepherd	PRJNA188158	SAMN21036185
OLGS000002	Old German Shepherd	PRJNA188158	SAMN21036186
OLGS000003	Old German Shepherd	PRJNA188158	SAMN21036187
OLGS000004	Old German Shepherd	PRJNA188158	SAMN21036188
OLGS000005	Old German Shepherd	PRJNA188158	SAMN21036190
OLGS000006	Old German Shepherd	PRJNA188158	SAMN21036189
PAPI000003	Papillon	PRJNA188158	SAMN21036420
PAPI000004	Papillon	PRJNA188158	SAMN21036421
PARS000002	Parson Russell Terrier	PRJNA188158	SAMN21036433
PARS000003	Parson Russell Terrier	PRJNA188158	SAMN21036434
PATR000001	Patterdale Terrier	PRJNA188158	SAMN21036435
PERH000001	Peruvian Hairless	PRJNA188158	SAMN21036426
PERH000002	Peruvian Hairless	PRJNA188158	SAMN21036427
PERH000003	Peruvian Hairless	PRJNA188158	SAMN21036428
PBGV000010	Petit Basset Griffon Vendeen	PRJNA188158	SAMN21036425
PG002__BGVP_17289	Petit Basset Griffon Vendeen	PRJEB11835	SAMEA3723573
PBGA000001	Petit Bleu de Gascogne	PRJNA188158	SAMN21036311
CFA290	Pitbull mix	PRJEB16012	SAMEA110175950
POLS000001	Polski Owczarek Nizinny	PRJNA188158	SAMN21036431
POLS000002	Polski Owczarek Nizinny	PRJNA188158	SAMN21036432
POMR000003	Pomeranian	PRJNA188158	SAMN21036528
POMR000004	Pomeranian	PRJNA188158	SAMN21036529
POMR000005	Pomeranian	PRJNA188158	SAMN21036530
POMR000006	Pomeranian	PRJNA188158	SAMN21036531
POMR000007	Pomeranian	PRJNA188158	SAMN21036532
POMR000008	Pomeranian	PRJNA188158	SAMN21036533
ZS002	Pomeranian	PRJEB16012	SAMEA10644740
ZS013	Pomeranian	PRJEB16012	SAMEA10644741
ZS14_2	Pomeranian	PRJEB16012	SAMEA4506892
ZS204	Pomeranian	PRJEB16012	SAMEA10644742
ZS205	Pomeranian	PRJEB16012	SAMEA10644743
ZS268	Pomeranian	PRJEB16012	SAMEA10644744
ZS551	Pomeranian	PRJEB16012	SAMEA10644745
ZS584	Pomeranian	PRJEB16012	SAMEA10644746
ZS613	Pomeranian	PRJEB16012	SAMEA10644747
ZS621	Pomeranian	PRJEB16012	SAMEA10644748
ZS623	Pomeranian	PRJEB16012	SAMEA7198603
ZS653	Pomeranian	PRJEB16012	SAMEA8157192
ZS657	Pomeranian	PRJEB16012	SAMEA10644749
ZS688	Pomeranian	PRJEB16012	SAMEA10644750
PL116	Poodle	PRJEB16012 / PRJEB30571	SAMEA4506891 / SAMEA5205225
PL279	Poodle	PRJEB16012	SAMEA110175540
MP166	Poodle (Miniature Poodle)	PRJEB16012	SAMEA6862943
MP167	Poodle (Miniature Poodle)	PRJEB16012	SAMEA6862944
MP168	Poodle (Miniature Poodle)	PRJEB16012	SAMEA6862945
MP170	Poodle (Miniature Poodle)	PRJEB16012	SAMEA6862946
MPOO000001	Poodle (Miniature Poodle)	PRJNA188158	SAMN21036430
TPOO000001	Poodle (Toy Poodle)	PRJNA188158	SAMN21036429
PTWD000004	Portuguese Water Dog	PRJNA188158	SAMN21036437
PTWD000005	Portuguese Water Dog	PRJNA188158	SAMN21036438
PTWD000006	Portuguese Water Dog	PRJNA188158	SAMN21036439
PULI000001	Puli	PRJNA188158	SAMN21036436
PYSH000001	Pyrenean Shepherd	PRJNA188158	SAMN21036253
PYSH000002	Pyrenean Shepherd	PRJNA188158	SAMN21036254
GPYR000001	Pyrenian Mountain Dog	PRJNA188158	SAMN21036422
GPYR000002	Pyrenian Mountain Dog	PRJNA188158	SAMN21036423
RHOD000002	Rhodesian Ridgeback	PRJNA188158	SAMN21036442
RR123	Rhodesian Ridgeback	PRJEB16012	SAMEA4504822
RR224	Rhodesian Ridgeback	PRJEB16012	SAMEA4505495
RR375	Rhodesian Ridgeback	PRJEB16012	SAMEA10644738
RR399	Rhodesian Ridgeback	PRJEB16012	SAMEA110415704
RR400	Rhodesian Ridgeback	PRJEB16012	SAMEA110415705
RO015	Rottweiler	PRJEB16012	SAMEA6249501
RO2	Rottweiler	PRJEB7735	SAMEA3121337
RTOY000001	Russian Toy Dog	PRJNA188158	SAMN21036444
RTOY000002	Russian Toy Dog	PRJNA188158	SAMN21036445
SAAR000001	Saarlooswolfhund	PRJNA188158	SAMN21036499
SR238	Saarlooswolfhund	PRJEB16012	SAMEA110175541
SR262	Saarlooswolfhund	PRJEB16012	SAMEA8157188
STBD000008	Saint Bernard	PRJNA188158	SAMN21036447
STBD000009	Saint Bernard	PRJNA188158	SAMN21036449
STBD000010	Saint Bernard	PRJNA188158	SAMN21036450
STBD000011	Saint Bernard	PRJNA188158	SAMN21036451
STBD000012	Saint Bernard	PRJNA188158	SAMN21036452
STBD000013	Saint Bernard	PRJNA188158	SAMN21036453
SL006	Saluki	PRJEB16012	SAMEA4504825
SAMO000004	Samojede	PRJNA188158	SAMN21036446
SCPD000001	Schapendoes	PRJNA188158	SAMN21036408
SCPD000002	Schapendoes	PRJNA188158	SAMN21036409
SKIP000003	Schipperke	PRJNA188158	SAMN21036468
SKIP000004	Schipperke	PRJNA188158	SAMN21036469
CFA518	Scottish Deerhound	PRJEB16012	SAMEA110415679
DEER000001	Scottish Deerhound	PRJNA188158	SAMN21036456
DEER000002	Scottish Deerhound	PRJNA188158	SAMN21036457
SC001	Scottish Terrier	PRJEB16012	SAMEA6862960
SC022	Scottish Terrier	PRJEB16012	SAMEA6862961
TS0001	Sealyham Terrier	PRJEB16012	SAMEA7198611
SP018	Shar Pei	PRJEB16012	SAMEA7198604
SP019	Shar Pei	PRJEB16012	SAMEA7198605
SP020	Shar Pei	PRJEB16012	SAMEA7198612
SPEI000001	Shar Pei	PRJNA188158	SAMN21036496
SPEI000002	Shar Pei	PRJNA188158	SAMN21036497
SPEI000003	Shar Pei	PRJNA188158	SAMN21036498
SS096	Shetland Sheepdog	PRJEB16012	SAMEA4867921
SS109	Shetland Sheepdog	PRJEB16012	SAMEA8797076
SSHP000003	Shetland Sheepdog	PRJNA188158	SAMN21036500
SHIB000002	Shiba Inu	PRJNA188158	SAMN21036467
CFA302	Shih Tzu	PRJEB16012	SAMEA110175951
CFA621	Shih Tzu	PRJEB16012	SAMEA110415683
SHIH000002	Shih Tzu	PRJNA188158	SAMN21036506
SHIH000003	Shih Tzu	PRJNA188158	SAMN21036507
KKH2684	Siberian Husky	PRJEB10823	SAMEA3539249
SY046	Siberian Husky	PRJEB16012	SAMEA104091559
SG006	Sloughi	PRJEB16012	SAMEA4506885
SLOU000002	Sloughi	PRJNA188158	SAMN21036458
SMSH000001	Small Swiss Hound	PRJNA188158	SAMN21036487
SMSH000002	Small Swiss Hound	PRJNA188158	SAMN21036488
SMSH000003	Small Swiss Hound	PRJNA188158	SAMN21036490
SMSH000004	Small Swiss Hound	PRJNA188158	SAMN21036491
SMSH000005	Small Swiss Hound	PRJNA188158	SAMN21036493
SMSH000006	Small Swiss Hound	PRJNA188158	SAMN21036494
SMSH000007	Small Swiss Hound	PRJNA188158	SAMN21036483
SMSH000008	Small Swiss Hound	PRJNA188158	SAMN21036484
SMSH000009	Small Swiss Hound	PRJNA188158	SAMN21036485
SMSH000010	Small Swiss Hound	PRJNA188158	SAMN21036486
SMSH000011	Small Swiss Hound	PRJNA188158	SAMN21036489
SMSH000012	Small Swiss Hound	PRJNA188158	SAMN21036492
SROV000001	South Russian Ovcharka	PRJNA188158	SAMN21036495
PE002	Spanish Waterdog	PRJEB7903	SAMEA3164479
SPWD000001	Spanish Waterdog	PRJNA188158	SAMN21036424
GS104	Spitz (Grossspitz)	PRJEB16012	SAMEA104105252
STB24	St. Bernard	PRJEB16012	SAMEA4848702
STB27	St. Bernard	PRJEB16012	SAMEA4848703
STBD000004	St. Bernard	PRJNA188158	SAMN21036448
STBD000005	St. Bernard	PRJNA188158	SAMN21036454
STBD000006	St. Bernard	PRJNA188158	SAMN21036455
SM010	Standard Schnauzer	PRJEB16012	SAMEA104500412
SSNZ000001	Standard Schnauzer	PRJNA188158	SAMN21036482
LJP027A2	Swedish Vallhund	PRJNA394814	SRR5834681
LJP030A2	Swedish Vallhund	PRJNA394814	SRR5834680
SV_25951	Swedish Vallhund	PRJEB21485	ERR2834335
SLH083	Swiss Hound	PRJEB16012	SAMEA110415706
SWHN000001	Swiss Hound	PRJNA188158	SAMN21036470
SWHN000002	Swiss Hound	PRJNA188158	SAMN21036471
SWHN000003	Swiss Hound	PRJNA188158	SAMN21036472
SWHN000004	Swiss Hound	PRJNA188158	SAMN21036473
SWHN000005	Swiss Hound	PRJNA188158	SAMN21036474
SWHN000006	Swiss Hound	PRJNA188158	SAMN21036475
SWHN000007	Swiss Hound	PRJNA188158	SAMN21036476
SWHN000008	Swiss Hound	PRJNA188158	SAMN21036477
SWHN000009	Swiss Hound	PRJNA188158	SAMN21036478
SWHN000010	Swiss Hound	PRJNA188158	SAMN21036479
SWHN000011	Swiss Hound	PRJNA188158	SAMN21036480
SWHN000012	Swiss Hound	PRJNA188158	SAMN21036481
TM001	Tamaskan	PRJEB16012	SAMEA6862952
TMSK000001	Tamaskan	PRJNA188158	SAMN21036508
THAI000001	Thai Ridgeback	PRJNA188158	SAMN21036509
THAI000002	Thai Ridgeback	PRJNA188158	SAMN21036510
THAI000003	Thai Ridgeback	PRJNA188158	SAMN21036511
TIBT000001	Tibetan Terrier	PRJNA188158	SAMN21036512
WE008	Weimaraner	PRJEB16012	SAMEA104283466
WE012	Weimaraner	PRJEB16012	SAMEA6862955
WE015	Weimaraner	PRJEB16012	SAMEA6862956
WE017	Weimaraner	PRJEB16012	SAMEA110175542
WEIM000003	Weimaraner	PRJNA188158	SAMN21036515
WEIM000004	Weimaraner	PRJNA188158	SAMN21036516
CFA150	Welsh Corgi (Cardigan)	PRJEB16012	SAMEA10644716
WELT000004	Welsh Terrier	PRJNA188158	SAMN21036526
WW174	West Highland White Terrier	PRJEB16012	SAMEA4506901
WW361	West Highland White Terrier	PRJEB16012	SAMEA4504842
WW362	West Highland White Terrier	PRJEB16012	SAMEA4509489
WW363	West Highland White Terrier	PRJEB16012	SAMEA4504843
WW364	West Highland White Terrier	PRJEB16012	SAMEA4504836
WW558	West Highland White Terrier	PRJEB16012	SAMEA104091561
WW635__West04	West Highland White Terrier	PRJEB16012	SAMEA5059501
WW637__West06	West Highland White Terrier	PRJEB16012	SAMEA5059502
WW639__West10	West Highland White Terrier	PRJEB16012	SAMEA5059503
WW640__West13	West Highland White Terrier	PRJEB16012	SAMEA5059504
WW641__West16	West Highland White Terrier	PRJEB16012	SAMEA5059505
WW642__West19	West Highland White Terrier	PRJEB16012	SAMEA5059506
WW643__West24	West Highland White Terrier	PRJEB16012	SAMEA5059507
WW644__West25	West Highland White Terrier	PRJEB16012	SAMEA5059508
WW645__West26	West Highland White Terrier	PRJEB16012	SAMEA5059509
WW646__West30	West Highland White Terrier	PRJEB16012	SAMEA5059510
WW665	West Highland White Terrier	PRJEB16012	SAMEA4848706
WW706	West Highland White Terrier	PRJEB16012	SAMEA8157189
WW707	West Highland White Terrier	PRJEB16012	SAMEA8157190
WW708	West Highland White Terrier	PRJEB16012	SAMEA8157191
WH118	Whippet	PRJEB16012	SAMEA5657394
WH122	Whippet	PRJEB16012	SAMEA5657395
WH129	Whippet	PRJEB16012	SAMEA7198608
WHIP000003	Whippet	PRJNA188158	SAMN21036517
BB011	White Swiss Shepherd Dog	PRJEB16012	SAMEA4506887
WSSD000005	White Swiss Shepherd Dog	PRJNA188158	SAMN21036212
WSSD000006	White Swiss Shepherd Dog	PRJNA188158	SAMN21036216
WSSD000007	White Swiss Shepherd Dog	PRJNA188158	SAMN21036217
WSSD000008	White Swiss Shepherd Dog	PRJNA188158	SAMN21036218
WSSD000009	White Swiss Shepherd Dog	PRJNA188158	SAMN21036219
WSSD000010	White Swiss Shepherd Dog	PRJNA188158	SAMN21036220
SLWP000001	Wire Haired Slovakian Pointer	PRJNA188158	SAMN21036502
SLWP000002	Wire Haired Slovakian Pointer	PRJNA188158	SAMN21036504
SLWP000003	Wire Haired Slovakian Pointer	PRJNA188158	SAMN21036503
SLWP000004	Wire Haired Slovakian Pointer	PRJNA188158	SAMN21036505
YORK000003	Yorkshire Terrier	PRJNA188158	SAMN21036527
YT003	Yorkshire Terrier	PRJEB13468	SAMEA3928145
ZZ045	Zwergschnauzer	PRJEB16012	SAMEA110415707
ZZ051	Zwergschnauzer	PRJEB16012	SAMEA110415708
